# Supplementary material
Source: PubMed Central journal article supplement (PMC4263268)
Supplement: 140047suppa2.pdf [file 140047suppa2.pdf]

**Table E1. Normal Ranges for Serum Measures**

| Parameter         | All Subjects and Ages | Female Subjects |             |             |         | Male Subjects |             |         |
|-------------------|-----------------------|-----------------|-------------|-------------|---------|---------------|-------------|---------|
|                   |                       | 8.3–9.7 y       | 10.5–11.4 y | 11.5–17.7 y | ≥18.1 y | 8.6–10 y      | 10.3–17.7 y | ≥18.2 y |
| TIBC (mcg/dL)     | 261–497               | NA              | NA          | NA          | NA      | NA            | NA          | NA      |
| Tf saturation (%) | 15–50                 | NA              | NA          | NA          | NA      | NA            | NA          | NA      |
| Tf (mg/dL)        | 200–400               | NA              | NA          | NA          | NA      | NA            | NA          | NA      |
| RDW (%)           | 11.5–14.5             | NA              | NA          | NA          | NA      | NA            | NA          | NA      |
| RCC (10 ×12/L)    | NA                    | 4–5.3           | 4–5.3       | 4.1–5.3     | 4.1–5.7 | 4–5.3         | 4.2–5.6     | 4–6     |
| Hb (g/dL)         | NA                    | 11.5–14.5       | 12–15       | 12–15       | 12–15.5 | 11.5–14.5     | 12.5–16.1   | 13.5–17 |
| Hct (%)           | NA                    | 33–43           | 35–47       | 35–47       | 36–47   | 33–43         | 36–47       | 39–51   |
| MCV (fL)          | NA                    | 76–90           | 78–95       | 78–95       | 82–100  | 76–90         | 78–95       | 82–100  |
| MCH (pg)          | NA                    | 25–31           | 26–32       | 26–32       | 25–33   | 25–31         | 26–32       | 25–33   |

Note.—Normal ranges are provided by the New York University Hospital Center Clinical Laboratories. Hb = hemoglobin, Hct = hematocrit, MCH = mean corpuscular hemoglobin, MCV = mean corpuscular volume, NA = not applicable, Tf = transferrin, TIBC = total iron binding capacity, RCC = red blood cell count, RDW = red blood cell distribution width. The normal ranges for iron are 37–170 mcg/dL for female subjects and 49–181 mcg/dL for male subjects. The normal ranges for ferritin are 10–143 ng/mL for female subjects and 30–440 ng/mL for male subjects.

**Table E2. ADHD Group Demographics**

| Parameter                    | ADHD Group (n = 22)* | Control vs ADHD Group Comparisons |                |                   |
|------------------------------|----------------------|-----------------------------------|----------------|-------------------|
|                              |                      | t <sup>†</sup>                    | U <sup>†</sup> | P Value           |
| Medication history           |                      |                                   |                |                   |
| Medicated                    | 10 (45) <sup>§</sup> | NA                                | NA             | NA                |
| Nonmedicated                 | 12 (55) <sup>§</sup> | NA                                | NA             | NA                |
| Type of ADHD                 |                      |                                   |                |                   |
| Combined                     | 14 (64) <sup>§</sup> | NA                                | NA             | NA                |
| Inattentive                  | 8 (36) <sup>§</sup>  | NA                                | NA             | NA                |
| Comorbidity                  |                      |                                   |                |                   |
| No                           | 11 (50) <sup>§</sup> | NA                                | NA             | NA                |
| Yes                          | 11 (50) <sup>§</sup> | NA                                | NA             | NA                |
| Male subjects                | 15 (68) <sup>§</sup> | NA                                | NA             | .10 <sup>  </sup> |
| Age (y)                      | 12.6 ± 2.8           | –0.8 (44)                         | NA             | .40               |
| WASI                         |                      |                                   |                |                   |
| FSIQ                         | 106.8 ± 15.6         | –1.0 (44)                         | NA             | .30               |
| VIQ                          | 107.0 ± 16.1         | –0.7 (42)                         | NA             | .46               |
| PIQ                          | 105.5 ± 15.7         | –1.1 (45)                         | NA             | .26               |
| CPRS-R:L (T score)           |                      |                                   |                |                   |
| ADHD Index                   | 72.8 ± 11.7          | NA                                | 2.0            | <.001             |
| DSM-IV Inattentive           | 73.8 ± 9.9           | NA                                | 2.0            | <.001             |
| DSM-IV Hyperactive-Impulsive | 67.4 ± 12.0          | NA                                | 24.0           | <.001             |
| DSM-IV Total                 | 72.2 ± 13.5          | NA                                | 30.0           | <.001             |
| BRIEF-Parent (T score)       |                      |                                   |                |                   |
| Behavioral Regulation Index  | 61.9 ± 10.1          | NA                                | 34.0           | <.001             |
| Metacognition Index          | 74.6 ± 10.2          | NA                                | 3.5            | <.001             |
| Global Executive Composite   | 71.6 ± 9.1           | NA                                | 2.0            | <.001             |

Note.—BRIEF-Parent = Behavioral Rating Inventory of Executive Function-Parent Version, CPRS-R:L = Conners Parent Rating Scale-Revised-Long Version, FSIQ = full scale IQ, NA = not applicable, PIQ = performance IQ, VIQ = verbal IQ, WASI = Wechsler Abbreviated Scale of Intelligence.

\* Data are means  $\pm$  standard deviations unless otherwise noted.

§ Data are numbers of subjects, with percentages in parentheses.

† Group comparisons (control subjects [see Table 1], ADHD patients) performed with Student *t* test (two tailed, unequal variances assumed). Numbers in parentheses are the *df*.

‡ Performed with Mann-Whitney *U* test (two tailed).

§ Data are numbers of subjects, with percentages in parentheses.

|| Pearson  $\chi^2$  (*df* = 1, *n* = 49) = 2.8 (two sided).

**Table E3. Subgroup Comparisons: MFC Indexes of Brain Iron in Voxels Dominated by Microscopic Contributions to MFC**

| ROI | Control Group ( <i>n</i> = 27)* | ADHD-Medicated Subgroup ( <i>n</i> = 10)* | ADHD-Nonmedicated Subgroup ( <i>n</i> = 12)* | Subgroup Comparisons <sup>†</sup> |                |          | Control Group vs ADHD-Medicated Subgroups <sup>§</sup> |          | Control Group vs ADHD-Nonmedicated Subgroup <sup>§</sup> |          | ADHD-Medicated vs ADHD-Nonmedicated Subgroups <sup>§</sup> |          |
|-----|---------------------------------|-------------------------------------------|----------------------------------------------|-----------------------------------|----------------|----------|--------------------------------------------------------|----------|----------------------------------------------------------|----------|------------------------------------------------------------|----------|
|     |                                 |                                           |                                              | $F_{2,46}^{\ddagger}$             | <i>P</i> Value | $\eta^2$ | <i>P</i> Value                                         | $r_{tb}$ | <i>P</i> Value                                           | $r_{tb}$ | <i>P</i> Value                                             | $r_{tb}$ |
| GP  | 475 ± 148                       | 445 ± 69                                  | 372 ± 88                                     | 2.9                               | .065           | 0.11     | NA                                                     | NA       | NA                                                       | NA       | NA                                                         | NA       |
| PUT | 204 ± 57                        | 211 ± 28                                  | 160 ± 35                                     | 8.8 (2) <sup>  </sup>             | .012           | 0.18     | .289                                                   | 0.2      | .019                                                     | 0.5      | .006                                                       | 0.7      |
| CN  | 250 ± 88                        | 240 ± 33                                  | 182 ± 36                                     | 12.6 (2) <sup>  </sup>            | .002           | 0.26     | .918                                                   | 0.0      | .002                                                     | 0.6      | .002                                                       | 0.8      |
| THL | 194 ± 53                        | 198 ± 49                                  | 160 ± 25                                     | 8.3 (2) <sup>  </sup>             | .016           | 0.17     | .682                                                   | 0.1      | .007                                                     | 0.6      | .025                                                       | 0.6      |

Note.—CN = caudate nucleus, GP = globus pallidus, NA = not applicable, PUT = putamen, THL = thalamus.

\* Data are total MFC (seconds<sup>-2</sup>) in means ± standard deviations.

<sup>†</sup> Subgroup comparisons (control group, ADHD-medicated subgroup, ADHD-nonmedicated subgroup; FDR corrected, *P* ≤ .024).

<sup>‡</sup> Performed with one-way analysis of variance unless otherwise noted.

<sup>§</sup> Posthoc multiple comparisons (FDR corrected, *P* ≤ .025). *P* values were determined with the two-tailed Mann-Whitney *U* test.

<sup>||</sup> Obtained with the Kruskal-Wallis test. Data are  $\chi^2$ , with *df* in parentheses.

**Table E4. Head Motion Analyses of MFC, T2, and T2\* Images**

| 0-Shift Image and Cohort   | CSF SNR*     | Ghosting Signal* |
|----------------------------|--------------|------------------|
| MFC (TE: 40 msec)          |              |                  |
| Control group              | 41.5 ± 3.7   | 39.8 ± 4.7       |
| ADHD-medicated subgroup    | 39.1 ± 2.9   | 40.2 ± 2.2       |
| ADHD-nonmedicated subgroup | 40.8 ± 2.4   | 38.9 ± 3.3       |
| T2 (TE:15 msec)            |              |                  |
| Control group              | 105.7 ± 14.3 | 12.7 ± 5.1       |
| ADHD-medicated subgroup    | 104.9 ± 12.6 | 14.0 ± 5.4       |
| ADHD-nonmedicated subgroup | 110.3 ± 15.5 | 12.9 ± 2.6       |
| T2* (TE:7 msec)            |              |                  |
| Control group              | 49.6 ± 4.1   | 19.2 ± 12.0      |
| ADHD-medicated subgroup    | 49.1 ± 4.2   | 16.1 ± 3.2       |
| ADHD-nonmedicated subgroup | 49.1 ± 2.2   | 14.3 ± 6.8       |

Note.—Subgroup comparisons (control group, ADHD-medicated subgroup, ADHD-nonmedicated subgroup) were performed with one-way analysis of variance. For subgroup comparisons,  $F_{2,46}$  was 2.0 and 0.3, respectively, for cerebrospinal fluid SNR and ghosting signal in MFC ( $P = .148$  and  $.721$ , respectively), 0.5 and 0.3 for T2 ( $P = .591$  and  $.752$ ), and 0.1 and 1.1 for T2\* ( $P = .898$  and  $.331$ ). CSF = cerebrospinal fluid, TE = echo time.

\* Data are means ± standard deviations.

**Table E5. Dietary Iron Intake and Serum Ferritin Level**

| Measure                                       | Control Group ( $n = 27$ )* | ADHD-Medicated Subgroup ( $n = 10$ )* | ADHD-Nonmedicated Subgroup ( $n = 12$ )* | Subgroup Comparisons: Kruskal-Wallis Test |           | Subgroup Comparisons: Fisher Exact Test |           |
|-----------------------------------------------|-----------------------------|---------------------------------------|------------------------------------------|-------------------------------------------|-----------|-----------------------------------------|-----------|
|                                               |                             |                                       |                                          | $\chi^2$ †                                | $P$ Value | Fisher Exact                            | $P$ Value |
| Dietary heme iron intake (mg/d)               | 2.4 ± 1.9                   | 2.1 ± 1.2                             | 3.1 ± 3.0                                | 0.6 (2)                                   | .72       | ...                                     | ...       |
| Dietary non-heme iron intake (mg/d)           | 4.1 ± 4.5                   | 2.7 ± 2.9                             | 2.9 ± 1.9                                | 1.4 (2)                                   | .51       | ...                                     | ...       |
| Ferritin level (ng/mL)                        | 38.2 ± 22.8                 | 50.3 ± 26.1                           | 51.3 ± 24.1                              | 1.7 (2,46)‡                               | .19       | ...                                     | ...       |
| Ferritin normalized level§                    | 0.12 ± 0.2                  | 0.11 ± 0.1                            | 0.14 ± 0.2                               | 0.5 (2)                                   | .77       | ...                                     | ...       |
| No. of subjects taking multivitamins          | 7 (26)                      | 5 (50)                                | 6 (50)                                   | ...                                       | ...       | 3.1                                     | .22       |
| No. of subjects with ferritin level ≤15 ng/mL | 4 (15)                      | 1 (10)                                | 0 (0)                                    | ...                                       | ...       | 1.7                                     | .38       |
| No. of subjects with ferritin level ≤30 ng/mL | 12 (44)                     | 2 (20)                                | 3 (25)                                   | ...                                       | ...       | 2.4                                     | .29       |
| No. of subjects with ferritin level ≤45 ng/mL | 18 (67)                     | 5 (50)                                | 7 (53)                                   | ...                                       | ...       | 1.0                                     | .68       |

\* Data are means ± standard deviations unless otherwise noted. Numbers in parentheses are percentages.

† Numbers in parentheses are the *df*.

‡ Obtained with one-way analysis of variance and is the *F* value, with *df* in parentheses.

§ Ratio within normal range for age and/sex.

**Table E6. Complete Serum Measures**

| Measure                      | Control Group* | ADHD-Medicating Subgroup* | ADHD-Nonmedicated Subgroup* | Subgroup Comparison  |                |
|------------------------------|----------------|---------------------------|-----------------------------|----------------------|----------------|
|                              |                |                           |                             | $F_{2,46}^{\dagger}$ | <i>P</i> Value |
| Blood draw time <sup>‡</sup> | 14.8 ± 3.1     | 15.2 ± 2.3                | 15.1 ± 3.5                  | 0.1 (2) <sup>§</sup> | .95            |
| Iron (mcg/dL)                | 65.7 ± 28.2    | 79.5 ± 23.3               | 74.8 ± 27.9                 | 1.1                  | .34            |
| TIBC (mcg/dL)                | 357.7 ± 54.8   | 352.3 ± 35.8              | 357.5 ± 41.4                | 0.0                  | .95            |
| Tf saturation (%)            | 18.6 ± 7.6     | 22.9 ± 6.8                | 21.6 ± 9.2                  | 1.3                  | .28            |
| Tf (mg/dL)                   | 290.8 ± 38.4   | 288.2 ± 26.2              | 293.1 ± 33.1                | 0.1                  | .95            |
| RCC (10 x12/L)               | 4.7 ± 0.5      | 5.1 ± 0.4                 | 4.6 ± 0.3                   | 4.0                  | .02            |
| Hb (g/dL)                    | 13.3 ± 1.2     | 14.2 ± 1.0                | 13.1 ± 1.3                  | 2.9                  | .06            |
| Hct (%)                      | 39.4 ± 3.5     | 41.9 ± 3.6                | 38.6 ± 3.1                  | 2.7                  | .08            |
| MCV (fL)                     | 84.4 ± 5.1     | 82.6 ± 2.8                | 84.0 ± 3.7                  | 2.0 (2) <sup>§</sup> | .37            |
| MCH (pg)                     | 28.5 ± 2.1     | 28.1 ± 1.0                | 28.5 ± 1.5                  | 0.2                  | .85            |
| RDW (%)                      | 12.1 ± 1.0     | 12.1 ± 0.8                | 12.2 ± 0.6                  | 0.1                  | .92            |
| Iron norm                    | 0.1 ± 0.2      | 0.26 ± 0.2                | 0.23 ± 0.2                  | 0.6                  | .54            |
| RCC norm                     | 0.47 ± 0.3     | 0.70 ± 0.2                | 0.40 ± 0.2                  | 3.4                  | .04            |
| Hb norm                      | 0.38 ± 0.3     | 0.57 ± 0.2                | 0.29 ± 0.4                  | 4.6 (2) <sup>§</sup> | .10            |
| Hct norm                     | 0.39 ± 0.3     | 0.58 ± 0.3                | 0.32 ± 0.3                  | 2.3                  | .12            |
| MCV norm                     | 0.40 ± 0.3     | 0.29 ± 0.2                | 0.39 ± 0.2                  | 0.5                  | .58            |
| MCH norm                     | 0.45 ± 0.4     | 0.38 ± 0.2                | 0.47 ± 0.3                  | 0.2                  | .79            |

Note.—Hb = hemoglobin, Hct = hematocrit, MCH = mean corpuscular hemoglobin, MCV = mean corpuscular volume, norm = normalized-ratio within normal range for age and/sex, Tf = transferrin, TIBC = total iron binding capacity, RCC = red blood cell count, RDW = red blood cell distribution width.

\* Data are means ± standard deviations.

‡ Time: 24 hour clock.

† Performed with one-way analysis of variance unless otherwise noted; none survived FDR correction.

§ Determined with the Kruskal-Wallis test. Data are  $\chi^2$ , with *df* in parentheses; none survived FDR correction.
